# Supplementary material
Source: HighWire-hosted journal article supplement (http://www.jneurosci.org/highwire/filestream/599589/field_highwire_adjunct_files/1/Suppl._Table_II.pdf)
Supplement: Suppl._Table_II.pdf [file Suppl._Table_II.pdf]

Supplementary Table II. Effect of PKD1-KD overexpression on dendritic length and branching in hippocampal neurons.

| Groups                              | Control  | PKD1 wt   | PKD1 kd   |
|-------------------------------------|----------|-----------|-----------|
| F. I. (8 h)                         | 343±17   | 828±34*   | 886±28*   |
| F. I. (12 h)                        | 396±15   | 1427±21*  | 1252±167* |
| F. I. (18 h)                        | 430±28   |           | 2864±86*  |
| F. I. (30 h)                        | 418±16   | 4852±292* | 4615±128* |
| Total dendritic length (12 h)       | 495±25   | 516±34    | 496±32    |
| Total dendritic length (18 h)       | 577±15   | 553±38    | 530±34    |
| Total dendritic length (30 h)       | 662±26   | 630±26    | 440±14*   |
| Number of dendritic branches (12 h) | 12.4±1.8 | ND        | 11.8±2.4  |
| Number of dendritic branches (18h)  | 16.2±2.6 | ND        | 15.6±0.8  |
| Number of dendritic branches (30 h) | 22.6±1.4 | 21.3±2.7  | 13.2±1.2* |

Fluorescence intensity (F. I.) values are expressed in pixels; 14 bits images were used for this type of measurement. Fluorescent intensity measurements were performed in the cell body of control non-transfected or PKD1-KD transfected neurons stained with the PKD1 rabbit polyclonal antiserum.

For evaluating dendritic shape parameters 7 DIV cultures were transfected with each of the constructs, fixed 12, 18 or 30 hours later, and processed for immunofluorescence with a mAb against MAP2 (a dendritic marker). Neurites labeled with MAP2 and exhibiting proximal to distal tapering were considered as dendrites; total dendritic length and number of dendritic branches were measured using the morphometric menu of the Metamorph as described previously (see Szebenyi et al., 2005). Dendritic length values are expressed in  $\mu\text{m}$ .

(\*) Values significantly different from those of control groups. Each value represents the mean  $\pm$  S.E.M. A total of 100 cells were analyzed for each experimental condition.
